# Supplementary material for: Electrochemical deposition of manganese oxide–phosphate–reduced graphene oxide composite and electrocatalysis of the oxygen evolution reaction
Source: Royal Society of Chemistry journal article supplement (doi:10.1039/c6ra01217e), 2016-01-01
Supplement: c6ra01217e1.pdf [file c6ra01217e1.pdf]

Electronic Supplementary Information

**Electrochemical Deposition of Manganese Oxide-Phosphate-Reduced  
Graphene Oxide Composite and Electrocatalysis of  
Oxygen Evolution Reaction**

Ahamed Irshad and Nookala Munichandraiah\*

Department of Inorganic and Physical Chemistry

Indian Institute of Science, Bangalore - 560012, India

---

\*Corresponding author; e-mail: [muni@ipc.iisc.ernet.in](mailto:muni@ipc.iisc.ernet.in); Tel: +91-80-2293 3183

## S1: Determination of percentage of carbon in the deposit

It was intended to make a correlation plot between the weight % of GO in the deposition bath and amount of carbon in the electrodeposit. For this, several electrodes were made by keeping the concentration of  $\text{KMnO}_4$  at 20 mM in 0.1 M phosphate buffer solution, while the weight % of GO in the electrolyte was gradually varied. Depositions were carried out at -1.05 V vs. SCE for 30 min and EDXA was obtained for each samples. The following equations were used to calculate the relative percentage in each case.

$$\text{Percentage of GO in the electrolyte} = \frac{\text{Weight of GO in the electrolyte}}{\text{Total weight of (GO + KMnO}_4\text{)}} \times 100$$

$$\text{Percentage of C in the deposit} = \frac{\text{Weight \% of C in the deposit from EDXA}}{\text{Total weight \% of (C + K + Mn + O + P)}} \times 100$$

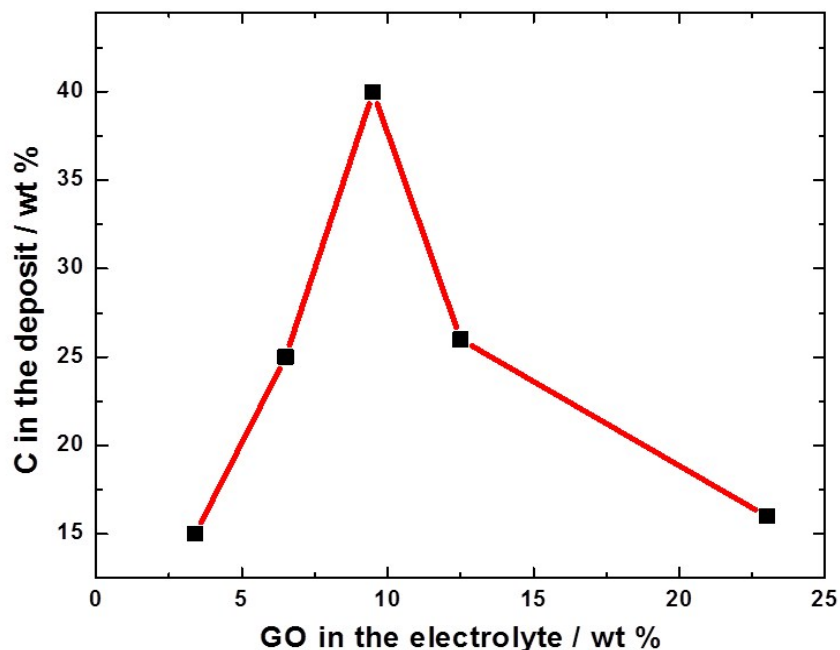

**Fig. S1:** A plot of % of C in the electrodeposit against weight % of GO in the deposition bath.

## S2: Comparison of OER activity

| Catalyst                                                          | Overpotential at 0.5 mA cm <sup>-2</sup> | References   |
|-------------------------------------------------------------------|------------------------------------------|--------------|
| <b>MnO<sub>x</sub>-Pi-rGO</b>                                     | 430 mV                                   | Present work |
| <b>MnO<sub>x</sub>-Pi</b>                                         | 560 mV                                   | Present work |
| <b>MnO<sub>2</sub><br/>(with SDS)</b>                             | 440 mV                                   | ESI-1        |
| <b>MnO<sub>2</sub><br/>(Dau's method)</b>                         | 565 mV                                   | ESI-2        |
| <b>Mn<sub>3</sub>(PO<sub>4</sub>)<sub>2</sub>·3H<sub>2</sub>O</b> | 680 mV                                   | ESI-3        |
| <b>MnO<sub>x</sub></b>                                            | >700 mV                                  | ESI-4        |

### S3: Faradaic efficiency measurement

The amount of evolved oxygen was quantified using water displacement in an inverted burette. Electrolysis in phosphate buffer solution was carried out at 2.0 V vs. RHE for 1 h in an air-tight glass container consisting of MnOx-Pi-rGO deposited Pt as the working electrode (area = 5 cm<sup>2</sup>), large Pt foil as the counter electrode and a saturated calomel electrode as the reference. The working electrode was prepared by depositing MnOx-Pi-rGO at -1.05 V vs. SCE for 30 min from 0.1 M neutral phosphate solution containing 20 mM KMnO<sub>4</sub> + 6.5 % GO. The evolved oxygen was collected in a water filled inverted burette. The volume of water displaced in the burette is an estimate for the volume of oxygen generated in the water electrolysis. It was observed that MnOx-Pi produced 71 μmol of oxygen within 1 h of electrolysis and a total charge of 30 C was passed. This corresponds to a Faradic efficiency about 92 %. Similar studies using MnOx-Pi catalyst (ie. without rGO) produced only 53 μmol of oxygen with a Faradic efficiency close to 90 %. Faradic efficiency was calculated using the following equation,

$$\text{The faradaic efficiency} = \frac{n_{\text{O}_2}(\text{experimental})}{n_{\text{O}_2}(\text{theoretical})} \times 100$$

The theoretical number of moles of oxygen evolved was obtained using Faraday's 2<sup>nd</sup> law of electrolysis according to the following equation,

$$n_{\text{O}_2}(\text{theoretical}) = \frac{Q}{nF} = \frac{i \times t}{nF}$$

where Q is the total charge passed, n is the number of electrons consumed per mole of O<sub>2</sub> (n= 4 for OER), i is the current in amperes, t is the electrolysis time in seconds, and F is the Faraday constant (96485.3 C mol<sup>-1</sup>).

#### S4: Stability test

The stability of MnOx-Pi-rGO catalyst was studied by constant potential electrolysis in 0.1 M potassium phosphate buffer solution (pH 7.0). For this, the catalyst was deposited on a Pt substrate at -1.05 V vs. SCE for 30 min from 0.1 M neutral phosphate electrolyte containing 20 mM KMnO<sub>4</sub> + 6.5 % GO. Current trace during electrolysis at 1.95 V vs. RHE is shown in Fig. S4. A current value of 2.7 mA cm<sup>-2</sup> is obtained in the initial stage of electrolysis and it decreases to 1.9 mA cm<sup>-2</sup> after 1 h, indicating a decrease in the current by 30 %.

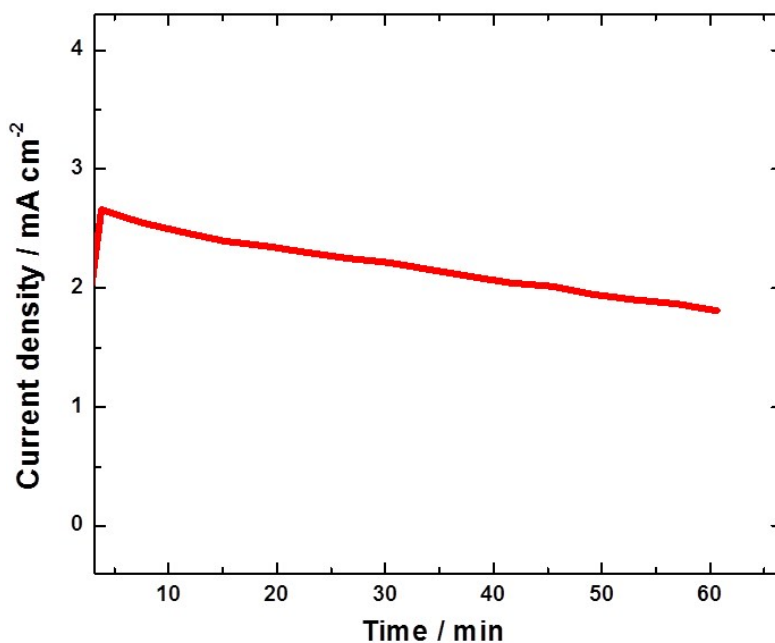

**Fig. S4:** Amperogram during electrolysis at 1.95 V vs. RHE in 0.1 M phosphate buffer solution (pH 7.0) using MnOx-Pi-rGO catalyst deposited on Pt.

## S5: Van der Pauw method for sheet resistance

Electrical conductivity was measured by four-probe Van der Pauw method using Agilent Device Analyzer B1500A. For this, catalysts were deposited on FTO electrodes at -1.3 V vs. SCE for 1 h. A square shaped piece was cut from this and electrical contacts were made at the four corners of the square using silver paste. To make a measurement, a current was passed along one edge of the sample (for instance,  $I_{21}$ ) and the voltage across the opposite edge ( $V_{34}$ ) was measured. From these two values, a resistance ( $R_{21,34}$ ) was calculated using Ohm's law. This procedure was repeated in different combinations and then, the sheet resistance ( $R_S$ ) was obtained by solving the following equation,<sup>ESI-5</sup>

$$\exp(-\pi R_A / R_S) + \exp(-\pi R_B / R_S) = 1$$

where  $R_A = \frac{(R_{21,34} + R_{12,43} + R_{43,12} + R_{34,21})}{4}$ , and

$$R_B = \frac{(R_{32,41} + R_{23,14} + R_{14,23} + R_{41,32})}{4}$$

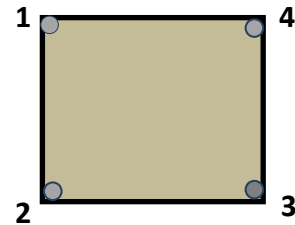

The sheet resistance was found to be  $7.5 \Omega / \text{sq}$  for MnOx-Pi-rGO which was almost half that of the MnOx-Pi ( $13.6 \Omega / \text{sq}$ ).

## **References**

[ESI-1]. W. T. Osowiecki, S. W. Sheehan, K. J. Young, A. C. Durrell, B. Q. Mercado and G. W. Brudvig, Surfactant-mediated Electrodeposition of a Water-oxidizing Manganese Oxide, *Dalton Trans.*, 2015, 44, 16873 - 16881.

[ESI-2]. I. Zaharieva, P. Chernev, M. Risch, K. Klingan, M. Kohlhoff, A. Fischer and H. Dau, Electrosynthesis, Functional, and Structural Characterization of a Water-Oxidizing Manganese Oxide, *Energy Environ. Sci.*, 2012, 5, 7081 - 7089.

[ESI-3]. K. Jin, J. Park, J. Lee, K. D. Yang, G. K. Pradhan, U. Sim, D. Jeong, H. L. Jang, S. Park, D. Kim, N. Sung, S. H. Kim, S. Han and K. T. Nam, Hydrated Manganese(II) Phosphate ( $\text{Mn}_3(\text{PO}_4)_2 \cdot 3 \text{H}_2\text{O}$ ) as a Water Oxidation Catalyst, *J. Am. Chem. Soc.*, 2014, 136, 7435 - 7443.

[ESI-4]. M. Huynh, D. K. Bediako and D. G. Nocera, Functionally Stable Manganese Oxide Oxygen Evolution Catalyst in Acid, *J. Am. Chem. Soc.*, 2014, 136, 6002 - 6010

[ESI-5]. L. J. V. Pauw, A Method of Measuring Specific Resistivity and Hall Effect of Discs of Arbitrary Shape, *Philips. Res. Rep.*, 1958, 13, 1 - 9.
